# Supplementary material for: Cytotoxic, Genotoxic and Senolytic Potential of Native and Micellar Curcumin
Source: MDPI journal article supplement (doi:10.3390/nu13072385), 2021-07-13
Supplement: s1 [file s1]

## **Supplementary material**

### **Cytotoxic, genotoxic and senolytic potential of native and micellar curcumin**

Lea Beltzig, Anna Frumkina, Christian Schwarzenbach  
and Bernd Kaina\*

Institute of Toxicology, University Medical Center,  
Obere Zahlbacher Straße 67, 55131 Mainz, Germany

\*Corresponding author

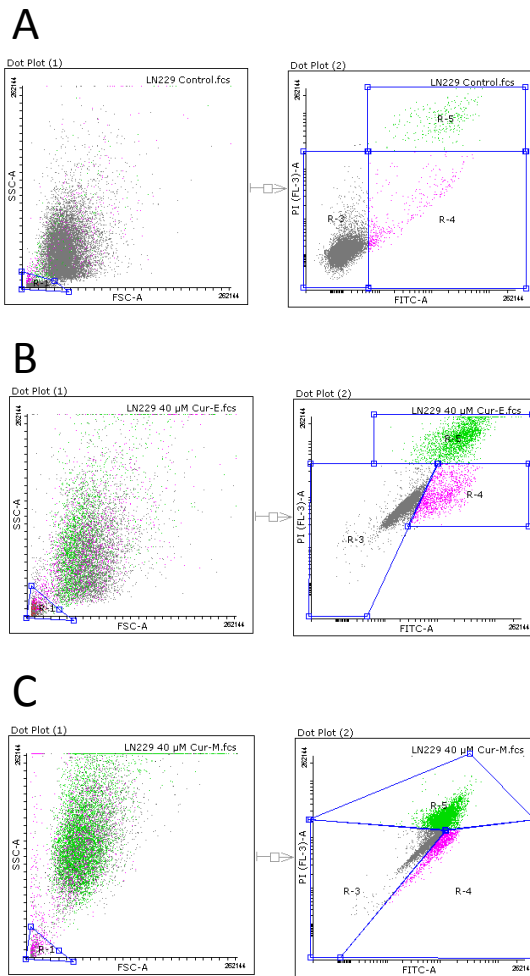

**Figure S1:** Representative plot of cells stained with annexin V and PI. A, control; B treated with Cur-E; C, treated with Cur-M (40  $\mu$ M, 48 h curcumin). Lower left corner indicates life cells, lower right the apoptotic and upper right the late apoptotic/necrotic fraction.

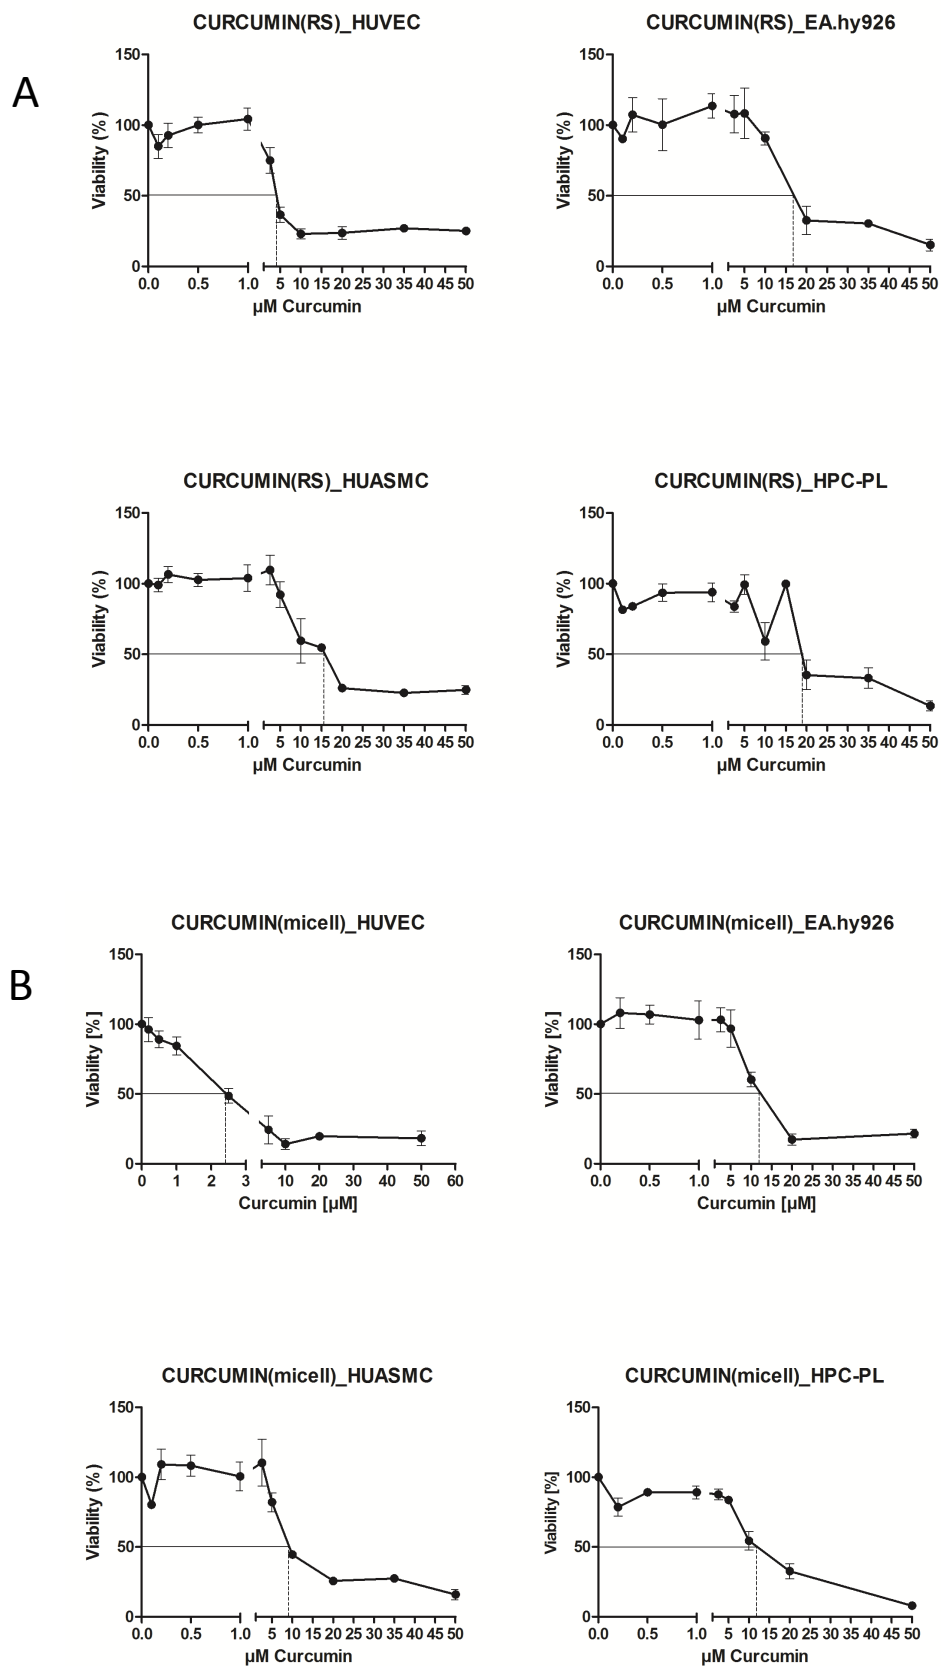

**Figure S2:** Effect of curcumin solubilized in ethanol (A) and micellar curcumin (B) on the viability of different primary human cell types.

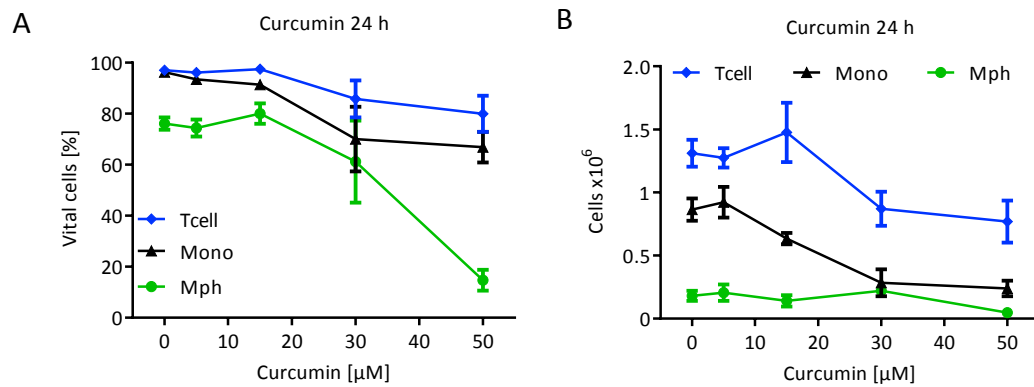

**Figure S3:** Effect of curcumin on freshly isolated human monocytes, macrophages and T cells. A, percentage of living cells; B, cell number in the population. Cells were incubated for 24 h in the presence of curcumin.

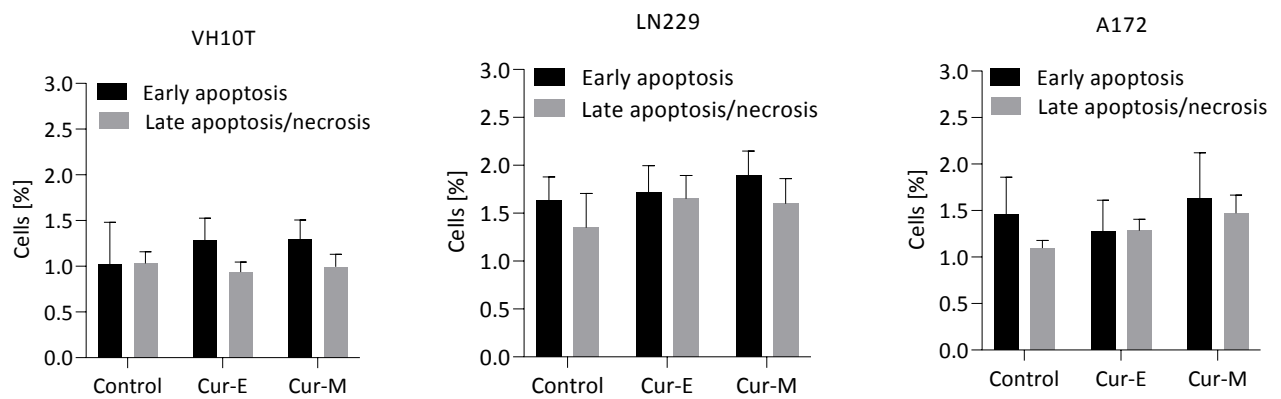

**Figure S4:** Cytotoxicity (apoptosis, necrosis) of VH10T, LN229 and A172 cells following treatment of exponentially growing populations with Cur-E or Cur-M (40  $\mu$ M) for 1 h and post-incubated 48 h. Cells were harvested and measured by flow cytometry. N=3, median $\pm$ SEM

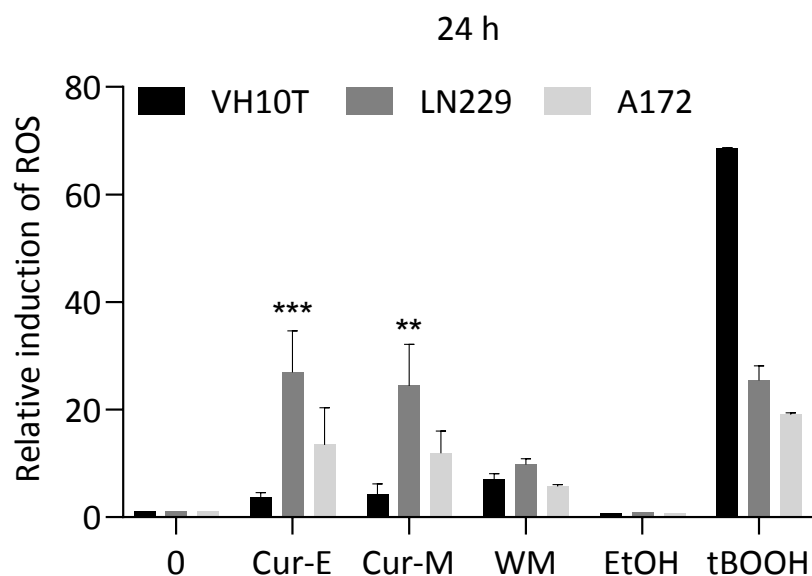

**Figure S5:** Induction of ROS following Curcumin treatment. Proliferating LN229, A172 and VH10T cells were treated with 40  $\mu$ M curcumin administered solubilized in ethanol (Cur-E) or packed in micelles (Cur-M). ROS was measured 24 h post treatment via DCFDA staining. Micelles without curcumin, ethanol and tBOOH served as controls.

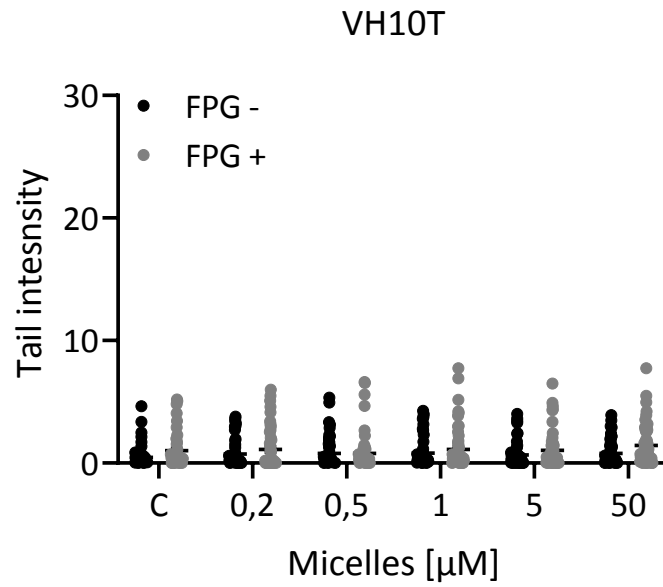

**Figure S6:** Effect of micelles filled with water in the FPG comet assay. Treatment of VH10T cells occurred for 60 min in complete medium.

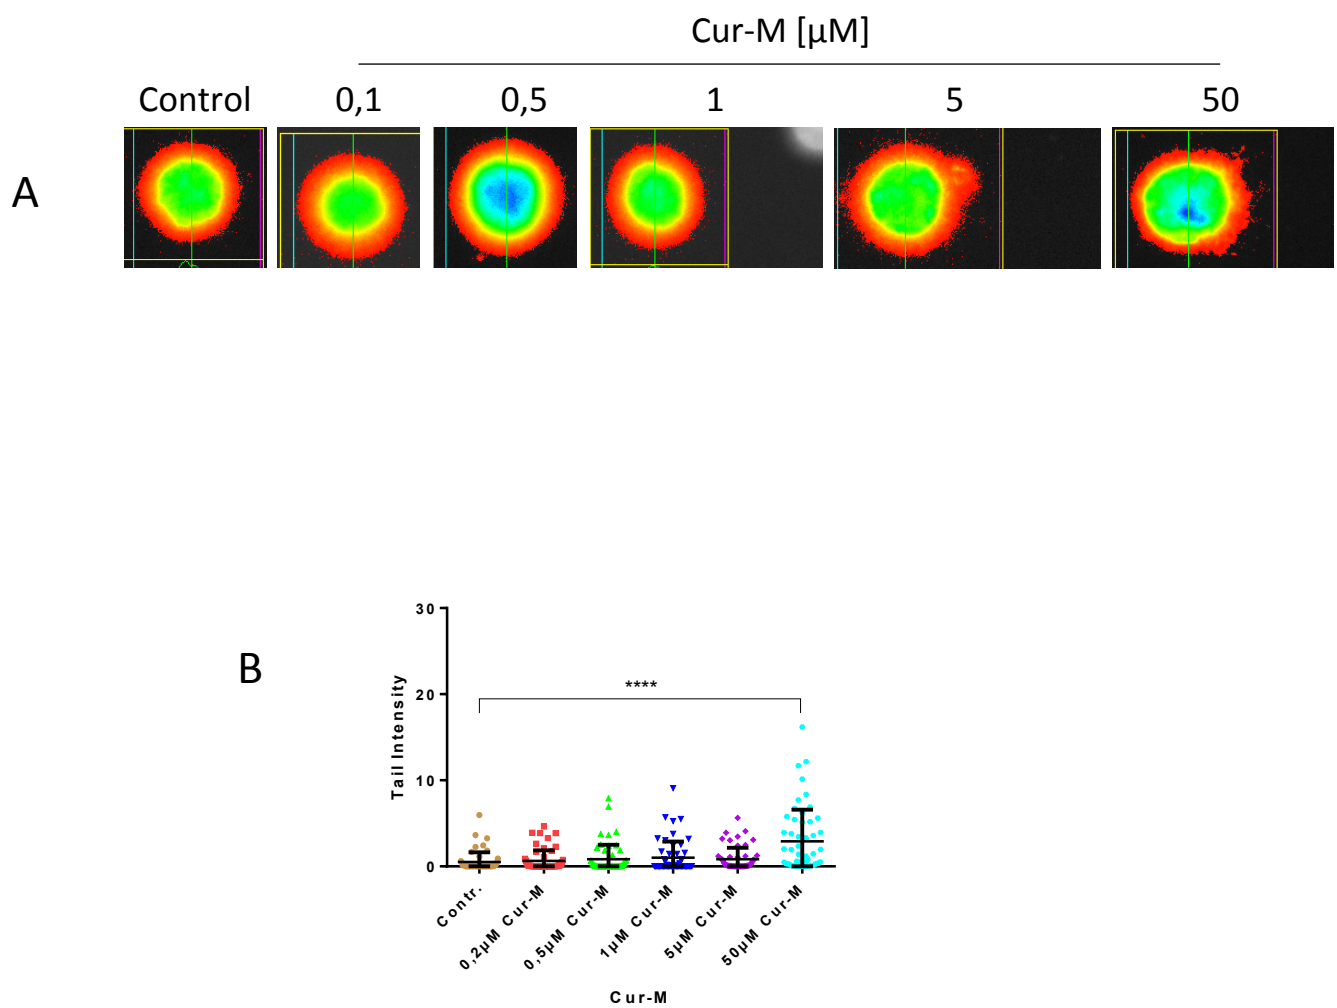

**Figure S7:** Effect of Cur-M on VH10T cells in the alkaline comet assay.

A, representative examples, B, quantification.

Cur-M was added to the medium 24 h before harvest of cells by trypsinization and comet assay.
